# Supplementary material for: Effective asexual reproduction of a widespread soft coral: comparative assessment of four different fragmentation methods
Source: PeerJ. 2022 Jan 19;10:e12589. doi: 10.7717/peerj.12589 (PMC8783554; doi:10.7717/peerj.12589)
Supplement: Supplemental Information 1 — Water parameters main, Success rate, Fragmentation time, Pulsation main, Oxygen flux main, Water parameters optimization, Success rate optimization, Pulsation optimization, Oxygen flux optimization. [file peerj-10-12589-s001.xlsx]

## Sheet: Water parameters main
Main experiment
Date	Tank	Temperature	Salinity	ammonium	phosphate	nitrite	nitrate	calcium	magnesium	pH
28.9.2020	Tank1	26.2	35.6	<0.05	<0.02	<0.01	<0.5	1140	420	8.29
	Tank2	25.4	35.4	<0.05	<0.02	<0.01	<0.5	1260	420	8.33
	Tank3	26.4	35.6	<0.05	<0.02	<0.01	<0.5	1260	420	8.2
	Tank4	25.7	35.4	<0.05	<0.02	<0.01	<0.5	1260	420	8.27
29.9.2020	Tank1	35.6	36
	Tank2	35.4	35.7
	Tank3	35.6	36
	Tank4	35.4	35.6
30.9.2020	Tank1	26	35.7
	Tank2	25.1	35.6
	Tank3	25.5	35.8
	Tank4	25.2	35.4
1.10.2020	Tank1	25.9	35.5	<0.05	<0.02	<0.025	<0.5
	Tank2	25.1	35.7	<0.05	<0.02	<0.01	<0.5
	Tank3	26.3	35.8	<0.05	<0.02	<0.01	<0.5
	Tank4	25.7	35.5	<0.05	<0.02	<0.01	<0.5
2.10.2020	Tank1	25.8	35.6
	Tank2	25.1	35.9
	Tank3	26.5	35.9
	Tank4	25.9	35.5
3.10.2020	Tank1	26.1	35.7
	Tank2	26.5	36
	Tank3	26.4	36
	Tank4	25.8	35.7
4.10.2020	Tank1	25.8	35.8
	Tank2	26.2	35.9
	Tank3	26.2	35.9
	Tank4	25.5	35.8
5.10.2020	Tank1	26	35.9	<0.05	<0.02	<0.01	<0.5	1140	380	8.25
	Tank2	26.3	35.9	<0.05	<0.02	<0.01	<0.5	1260	420	8.29
	Tank3	26.2	35.9	<0.05	<0.02	<0.01	<0.5	1260	420	8.21
	Tank4	25.7	36	<0.05	<0.02	<0.01	<0.5	1260	420	8.22
6.10.2020	Tank1	26.1	35.6
	Tank2	26.5	35.8
	Tank3	26.4	35.7
	Tank4	25.6	35.7
7.10.2020	Tank1	26.1	35.8
	Tank2	26.4	35.8
	Tank3	26.3	35.9
	Tank4	25.6	35.7
8.10.2020	Tank1	26.1	35.7	<0.05	<0.02	<0.01	<0.5
	Tank2	26.3	35.8	<0.05	<0.02	<0.01	<0.5
	Tank3	26.2	35.7	<0.05	<0.02	<0.01	<0.5
	Tank4	25.7	35.6	<0.05	<0.02	<0.01	<0.5
9.10.2020	Tank1	NA	NA
	Tank2	NA	NA
	Tank3	NA	NA
	Tank4	NA	NA
10.10.2020	Tank1	26	35.4
	Tank2	26.1	35.4
	Tank3	26.1	35.4
	Tank4	25.5	35.6

## Sheet: Success rate main
Tank	Treatment	success rate (%)
T1	Glue	20
T2	Glue	0
T3	Glue	0
T4	Glue	0
T1	Rubber	60
T2	Rubber	40
T3	Rubber	40
T4	Rubber	40
T1	Tunnel	20
T2	Tunnel	60
T3	Tunnel	20
T4	Tunnel	80
T1	Plug	80
T2	Plug	100
T3	Plug	100
T4	Plug	100

## Sheet: Fragmentation time
Tank	Treatment	fragmentation time (sec plug^-1)
T1	Glue	72
T2	Glue	120
T3	Glue	72
T4	Glue	120
T1	Rubber	120
T2	Rubber	144
T3	Rubber	132
T4	Rubber	108
T1	Tunnel	108
T2	Tunnel	60
T3	Tunnel	108
T4	Tunnel	60
T1	Plug	60
T2	Plug	60
T3	Plug	84
T4	Plug	108

## Sheet: Pulsation main
Main experiment
Tank	Day	Treatment	Pulsation rate (pulses min^-1)
T1	2	Control	22.7
T2	2	Control	30.7
T3	2	Control	30
T4	2	Control	34
T1	4	Control	32
T2	4	Control	40
T3	4	Control	32.7
T4	4	Control	38.7
T1	6	Control	33.7
T2	6	Control	36.3
T3	6	Control	35.3
T4	6	Control	37.7
T1	8	Control	37
T2	8	Control	39
T3	8	Control	39
T4	8	Control	41
T1	10	Control	34
T2	10	Control	38
T3	10	Control	42
T4	10	Control	33
T1	12	Control	42
T2	12	Control	43
T3	12	Control	43
T4	12	Control	45
T1	2	Rubber	26.3
T2	2	Rubber	23.3
T3	2	Rubber	26.3
T4	2	Rubber	25
T1	4	Rubber	34.7
T2	4	Rubber	36
T3	4	Rubber	34.7
T4	4	Rubber	33
T1	6	Rubber	35
T2	6	Rubber	39.3
T3	6	Rubber	39.7
T4	6	Rubber	37.7
T1	8	Rubber	41
T2	8	Rubber	40
T3	8	Rubber	40
T4	8	Rubber	40
T1	10	Rubber	39
T2	10	Rubber	40
T3	10	Rubber	36
T4	10	Rubber	38
T1	12	Rubber	44
T2	12	Rubber	43
T3	12	Rubber	43
T4	12	Rubber	42
T1	2	Tunnel	23.7
T2	2	Tunnel	35.3
T3	2	Tunnel	25
T4	2	Tunnel	30.7
T1	4	Tunnel	37
T2	4	Tunnel	33.7
T3	4	Tunnel	31.3
T4	4	Tunnel	37.7
T1	6	Tunnel	34.7
T2	6	Tunnel	40.3
T3	6	Tunnel	31.7
T4	6	Tunnel	33.7
T1	8	Tunnel	42
T2	8	Tunnel	44
T3	8	Tunnel	43
T4	8	Tunnel	41
T1	10	Tunnel	39
T2	10	Tunnel	39
T3	10	Tunnel	39
T4	10	Tunnel	39
T1	12	Tunnel	44
T2	12	Tunnel	47
T3	12	Tunnel	44
T4	12	Tunnel	45
T1	2	Plug	28
T2	2	Plug	30
T3	2	Plug	31
T1	4	Plug	35
T2	4	Plug	39.7
T3	4	Plug	37.7
T4	4	Plug	42
T1	6	Plug	38.7
T2	6	Plug	38.7
T3	6	Plug	41
T4	6	Plug	41.7
T1	8	Plug	42
T2	8	Plug	46
T3	8	Plug	45
T4	8	Plug	46
T1	10	Plug	40
T2	10	Plug	41
T3	10	Plug	40
T4	10	Plug	40
T1	12	Plug	46
T2	12	Plug	44
T3	12	Plug	44
T4	12	Plug	46

## Sheet: Oxygen flux main
Main experiment
Tank	Treatment	Pgross (µg O2 Polyp-1 h-1)	R (µg O2 Polyp-1 h-1)	Pnet (µg O2 Polyp-1 h-1)
T1	Control	9.58994	-2.06289	7.52704
T2	Control	8.10435	-5.25217	2.85217
T4	Control	8.18824	-3.71092	4.47731
T1	Rubber	7.56364	-4.65455	2.90909
T2	Rubber	7.84	-4.56	3.28
T4	Rubber	13.7846	-5.41538	8.36923
T1	Tunnel	5.68889	-4.08889	1.6
T2	Tunnel	5.77778	-3.37778	2.4
T4	Tunnel	10.8235	-5.08235	5.74118
T1	Plug	10.6667	-5.48571	5.18095
T2	Plug	8.12308	-3.93846	4.18462
T4	Plug	7.85455	-4.58182	3.27273
Pgross: gross photosynthesis, Pnet: net photosynthesis, R: respiration

## Sheet: Water parameters optimization
Optimization
Date	Tank	Temperature	Salinity	ammonium	phosphate	nitrite	nitrate	calcium	magnesium	pH
14.10.2020	Tank1	26.1	35.4	<0.05	<0.02	<0.01	<0.5	1260	420	8.23
	Tank2	26	35.5	<0.05	<0.02	<0.01	<0.5	1260	420	8.19
	Tank3	25.9	35.4	<0.05	<0.02	<0.01	<0.5	1260	420	8.23
15.10.2020	Tank1	26.1	35.6
	Tank2	25.9	35.4
	Tank3	26	35.6
16.10.2020	Tank1	26.4	36.1
	Tank2	26.2	35.8
	Tank3	26.3	36
17.10.2020	Tank1	26.2	35.5
	Tank2	25.8	35.4
	Tank3	25.8	35.6
18.10.2020	Tank1	26	35.5	<0.05	<0.02	<0.01	<0.5	1260	420	8.27
	Tank2	25.9	35.5	<0.05	<0.02	<0.01	<0.5	1260	420	8.21
	Tank3	25.8	35.5	<0.05	<0.02	<0.01	<0.5	1260	420	8.22
19.10.2020	Tank1	26.2	35.5
	Tank2	25.9	35.6
	Tank3	26	35.6
20.10.2020	Tank1	26.4	35.4
	Tank2	26.1	35.4
	Tank3	26	35.5
21.10.2020	Tank1	26.5	35.4
	Tank2	26.4	35.4
	Tank3	26.1	35.5

## Sheet: Success rate optimization
Optimization
Tank	Hours post fragmentation (h)	Unattached (%)	Egg crate (%)	Plug (%)
T1	24	80	20	0
T2	24	80	20	0
T3	24	60	20	20
T1	48	0	20	80
T2	48	0	20	80
T3	48	20	60	20
T1	72	0	0	100
T2	72	0	0	100
T3	72	0	0	100

## Sheet: Pulsation optimization
Optimization
Tank	Day	Treatment	Puls min^-1
T1	1	C	41
T1	1	P	28
T1	1	P	38
T1	1	P	36
T1	1	P	30
T1	1	P	33
T2	1	C	44
T2	1	P	33
T2	1	P	31
T2	1	P	29
T2	1	P	32
T3	1	C	44.3333
T3	1	P	22
T3	1	P	28
T3	1	P	33
T1	2	C	42.6667
T1	2	P	39
T1	2	P	42.6667
T1	2	P	34
T1	2	P	32.3333
T1	2	P	35.3333
T2	2	C	42
T2	2	P	39.6667
T2	2	P	37.3333
T2	2	P	30.6667
T2	2	P	40.6667
T2	2	P	38.6667
T3	2	C	40.6667
T3	2	P	40.6667
T3	2	P	37
T3	2	P	38.6667
T3	2	P	34.6667
T1	3	C	42
T1	3	P	45
T1	3	P	42.6667
T1	3	P	45.3333
T1	3	P	39.6667
T1	3	P	44.3333
T2	3	C	42.3333
T2	3	P	46.6667
T2	3	P	41
T2	3	P	41.6667
T2	3	P	46.3333
T2	3	P	45
T3	3	C	41.3333
T3	3	P	43.3333
T3	3	P	40
T3	3	P	37.3333
T3	3	P	44.6667
T3	3	P	40.6667
T1	4	C	44
T1	4	P	42.3333
T1	4	P	41.6667
T1	4	P	45
T1	4	P	43.6667
T1	4	P	45.3333
T2	4	C	42.6667
T2	4	P	39.6667
T2	4	P	44.3333
T2	4	P	45
T2	4	P	44.3333
T2	4	P	43
T3	4	C	41.3333
T3	4	P	43.6667
T3	4	P	43
T3	4	P	41.6667
T3	4	P	44
T3	4	P	42.6667
T1	5	C	43.6667
T1	5	P	46.6667
T1	5	P	44.3333
T1	5	P	47.3333
T1	5	P	43.3333
T1	5	P	45.6667
T2	5	C	42.6667
T2	5	P	45.6667
T2	5	P	46.6667
T2	5	P	45
T2	5	P	44.6667
T2	5	P	45.3333
T3	5	C	43.3333
T3	5	P	45.3333
T3	5	P	44.3333
T3	5	P	43.6667
T3	5	P	45
T3	5	P	45
T1	6	C	41.6667
T1	6	P	47
T1	6	P	46
T1	6	P	47.6667
T1	6	P	46.6667
T1	6	P	45.3333
T2	6	C	41.3333
T2	6	P	45.3333
T2	6	P	46.3333
T2	6	P	44
T2	6	P	43.6667
T2	6	P	45.6667
T3	6	C	40.3333
T3	6	P	47.3333
T3	6	P	43
T3	6	P	45.3333
T3	6	P	48
T3	6	P	43.6667
T1	7	C	42.6667
T1	7	P	45
T1	7	P	45.3333
T1	7	P	44.6667
T1	7	P	46
T1	7	P	45
T2	7	C	42.6667
T2	7	P	45.3333
T2	7	P	46.6667
T2	7	P	47
T2	7	P	46.6667
T2	7	P	45.6667
T3	7	C	42.3333
T3	7	P	47.3333
T3	7	P	46.6667
T3	7	P	48
T3	7	P	49
T3	7	P	44.6667

## Sheet: Oxygen flux optimization
Optimization
Tank	Treatment	Pgross (µg O2 Polyp-1 h-1)	R (µg O2 Polyp-1 h-1)	Pnet (µg O2 Polyp-1 h-1)
T1	C	7.39649	-2.56842	4.82807
T2	C	6.86933	-3.22133	3.648
T3	C	6.03077	-3.15897	2.87179
T1	P	9.92	-4.69333	5.22667
T2	P	9.92	-4.48	5.44
T3	P	12.0533	-4.16	7.89333
Pgross: gross photosynthesis, Pnet: net photosynthesis, R: respiration
